# Supplementary material for: Xylitol as a Hydrophilization Moiety for a Biocatalytically Synthesized Ibuprofen Prodrug
Source: MDPI journal article supplement (doi:10.3390/ijms23042026), 2022-02-11
Supplement: s1 [file s1]

## Supplementary Materials

Article

# Xylitol as a Hydrophilization Moiety for a Biocatalytically Synthesized Ibuprofen Prodrug

Federico Zappaterra, Chiara Tupini, Daniela Summa, Virginia Cristofori, Stefania Costa, Claudio Trapella, Ilaria Lampronti and Elena Tamburini

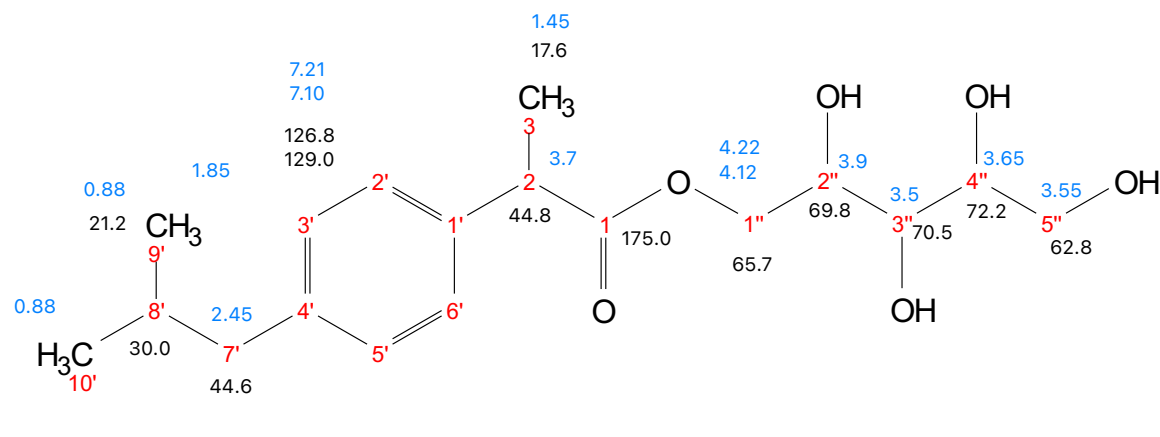

**Figure S1:** <sup>1</sup>H- and <sup>13</sup>C-NMR attribution of IBU-xylitol ester.

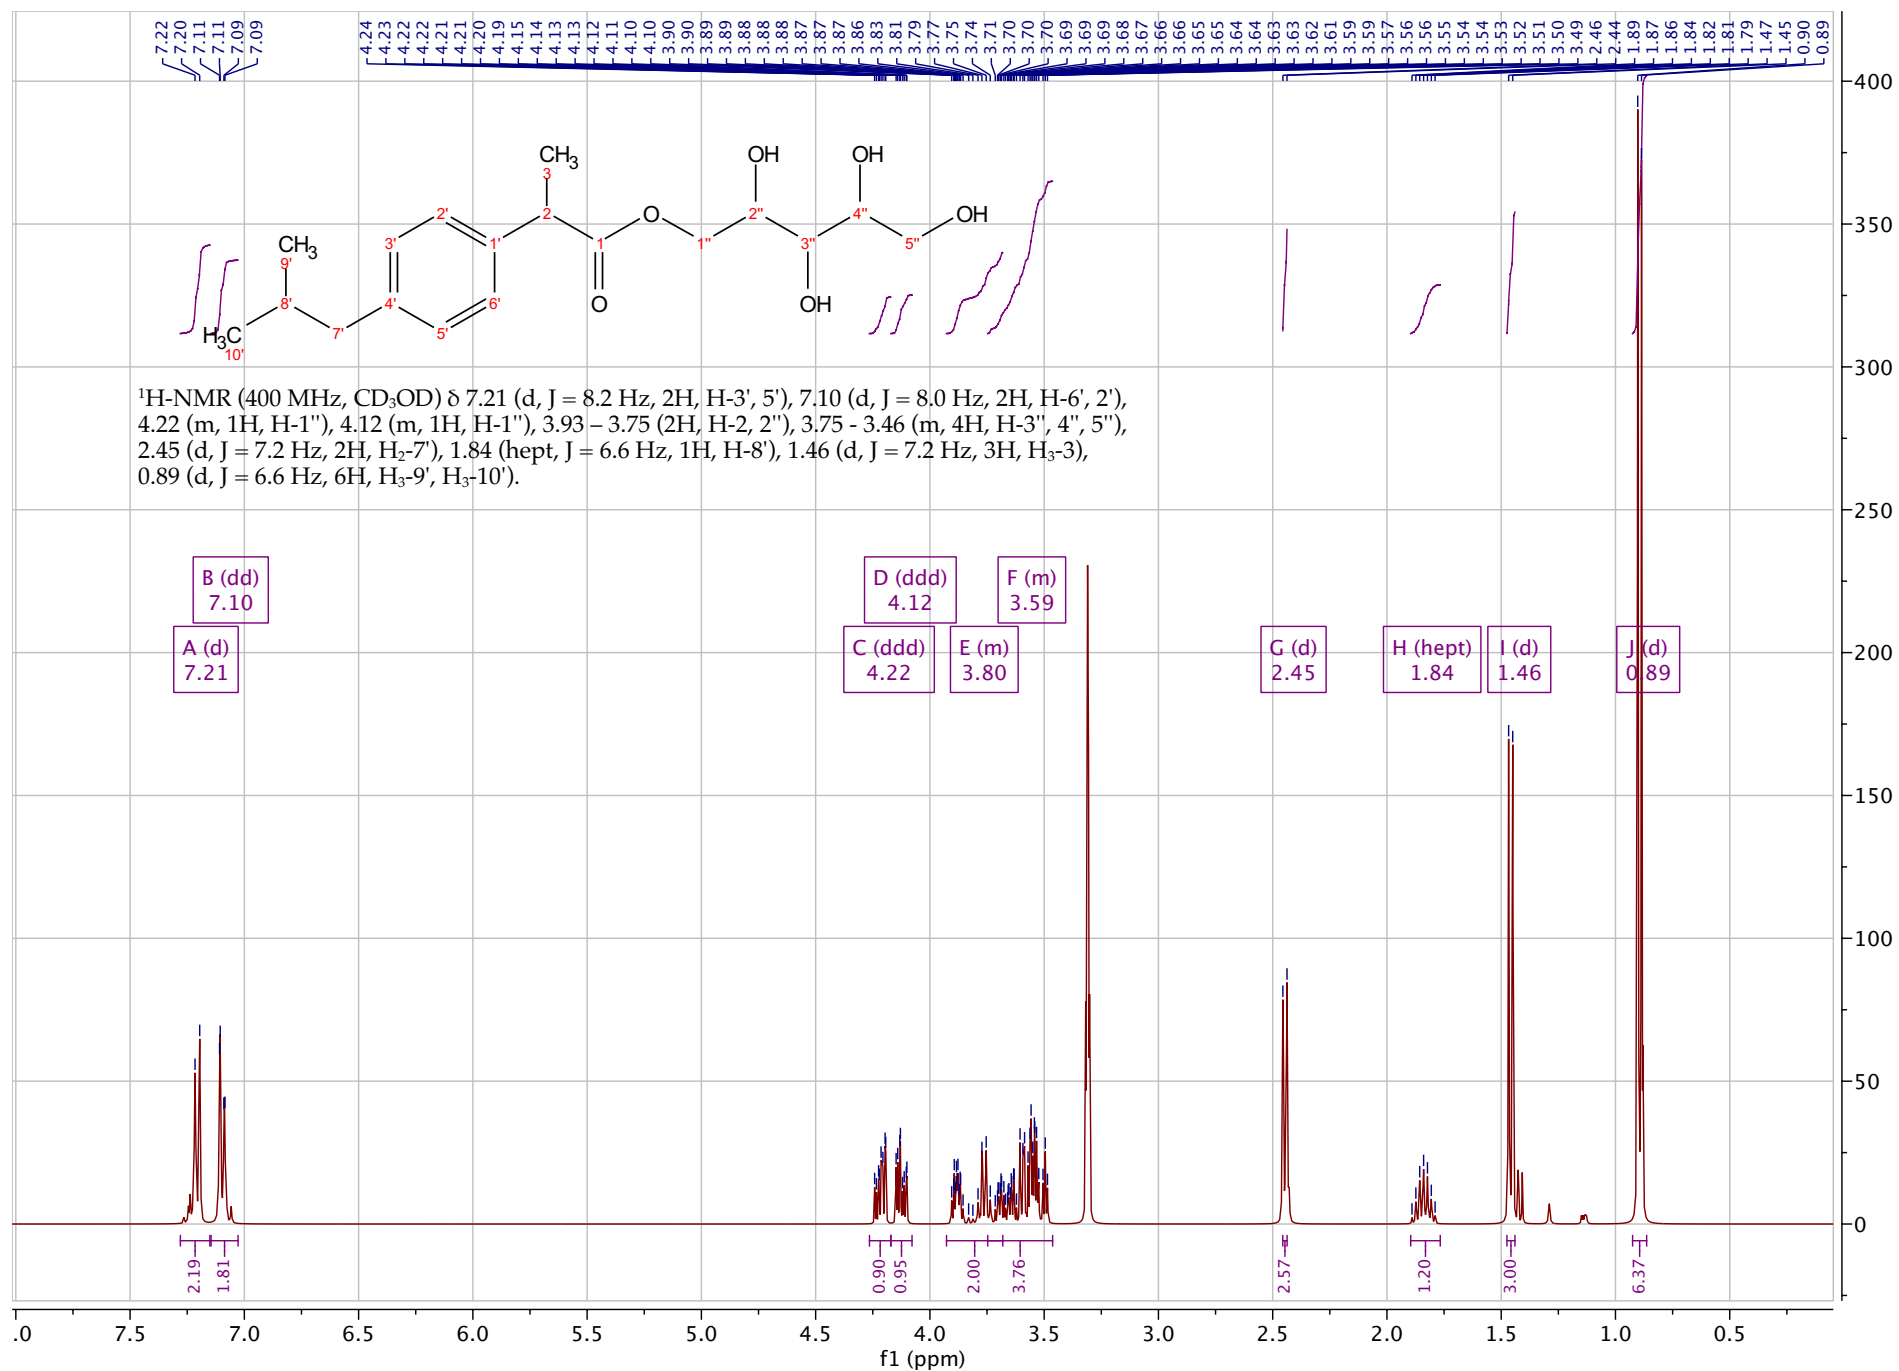

Figure S2: <sup>1</sup>H-NMR spectra of IBU-xylitol ester; RT, Methanol-d<sub>4</sub>, 400 MHz.

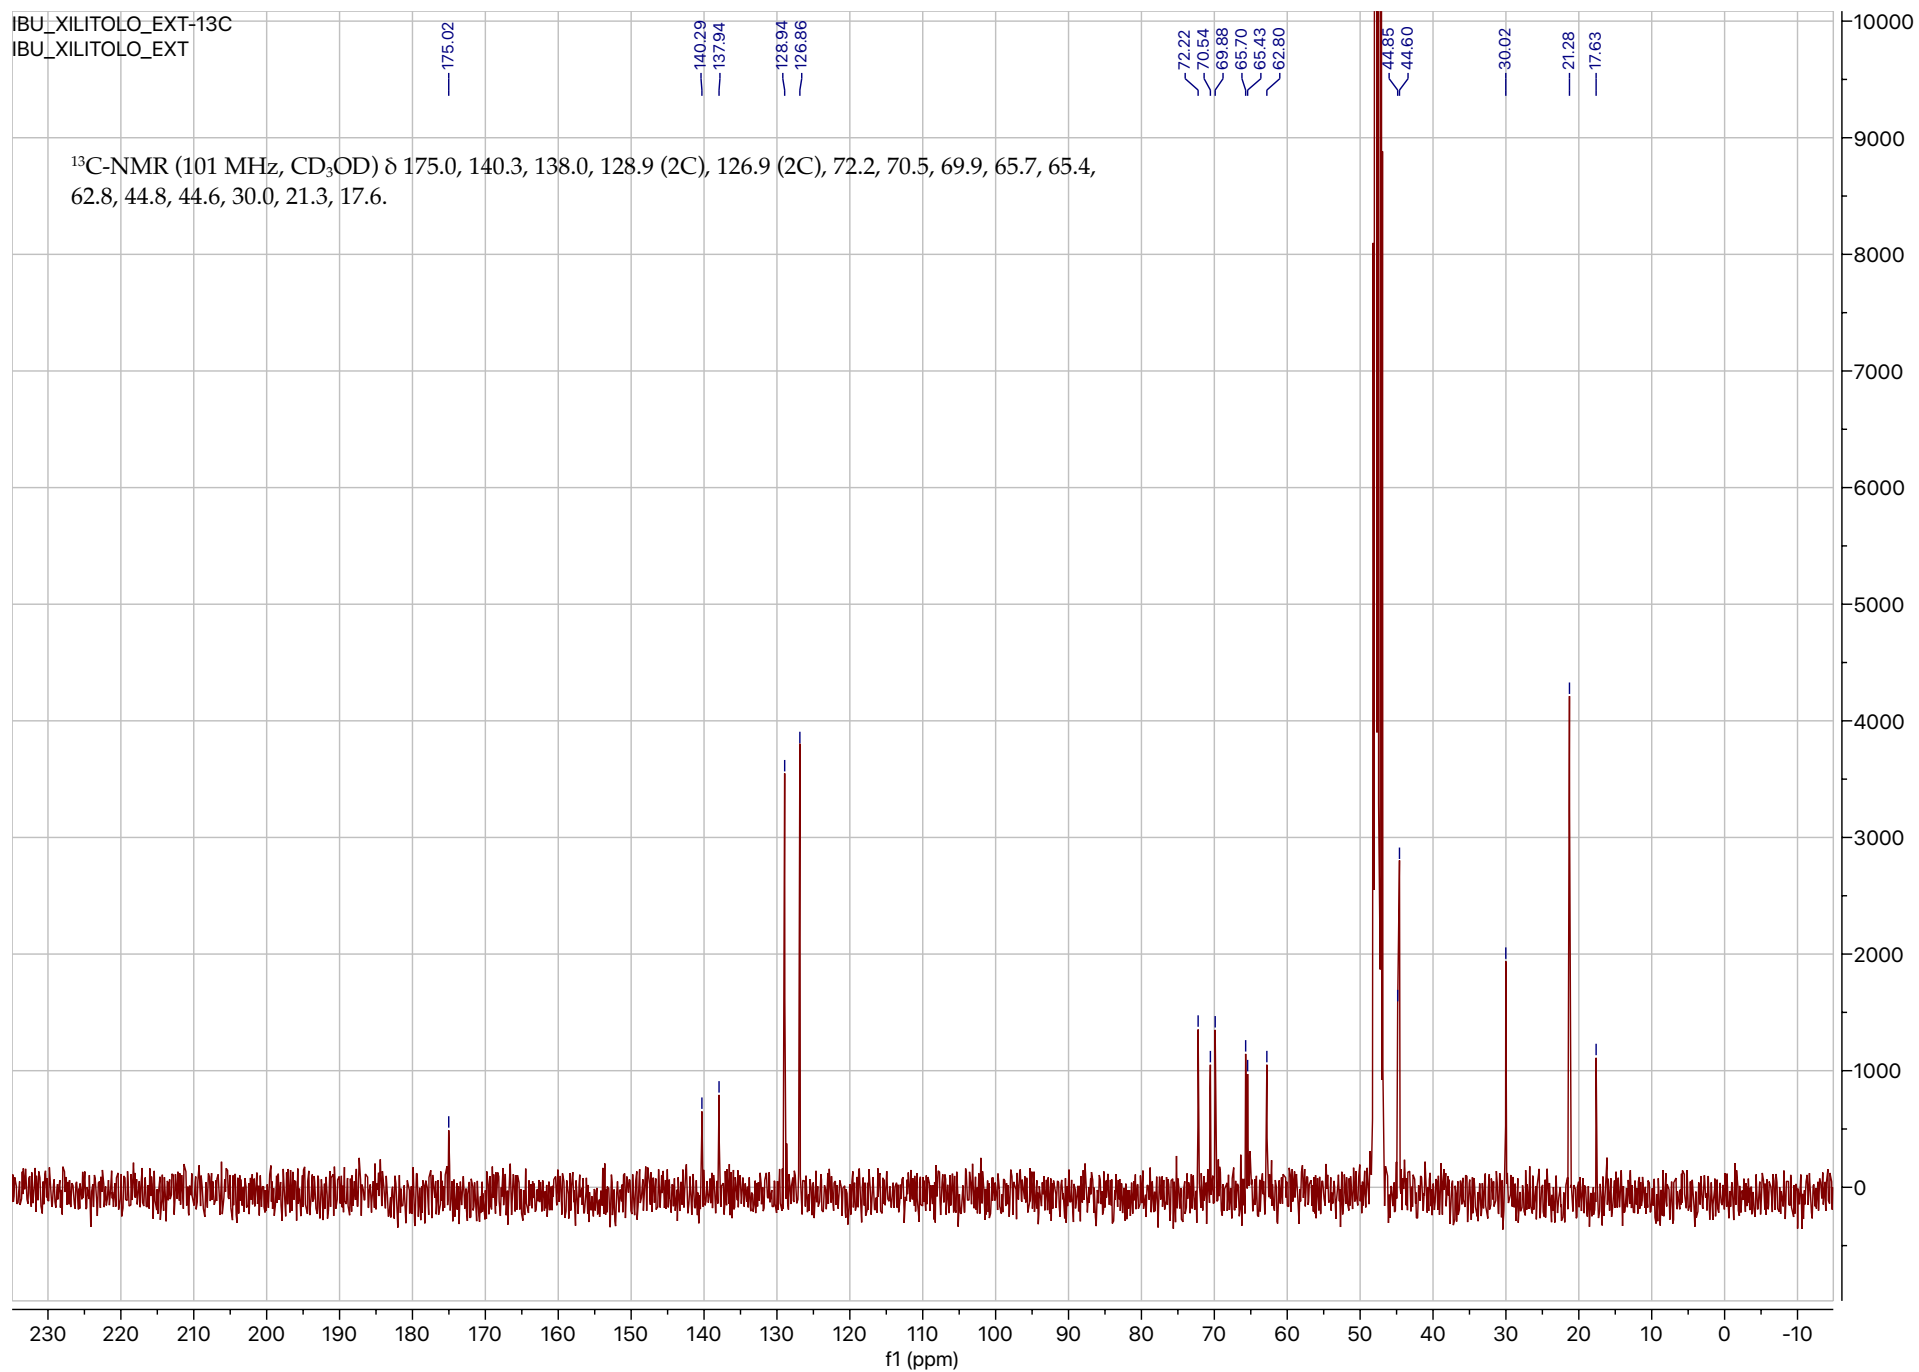

Figure S3:  $^{13}\text{C}$ -NMR of IBU-xylitol ester; RT, Methanol- $\text{d}_4$ , 101 MHz.

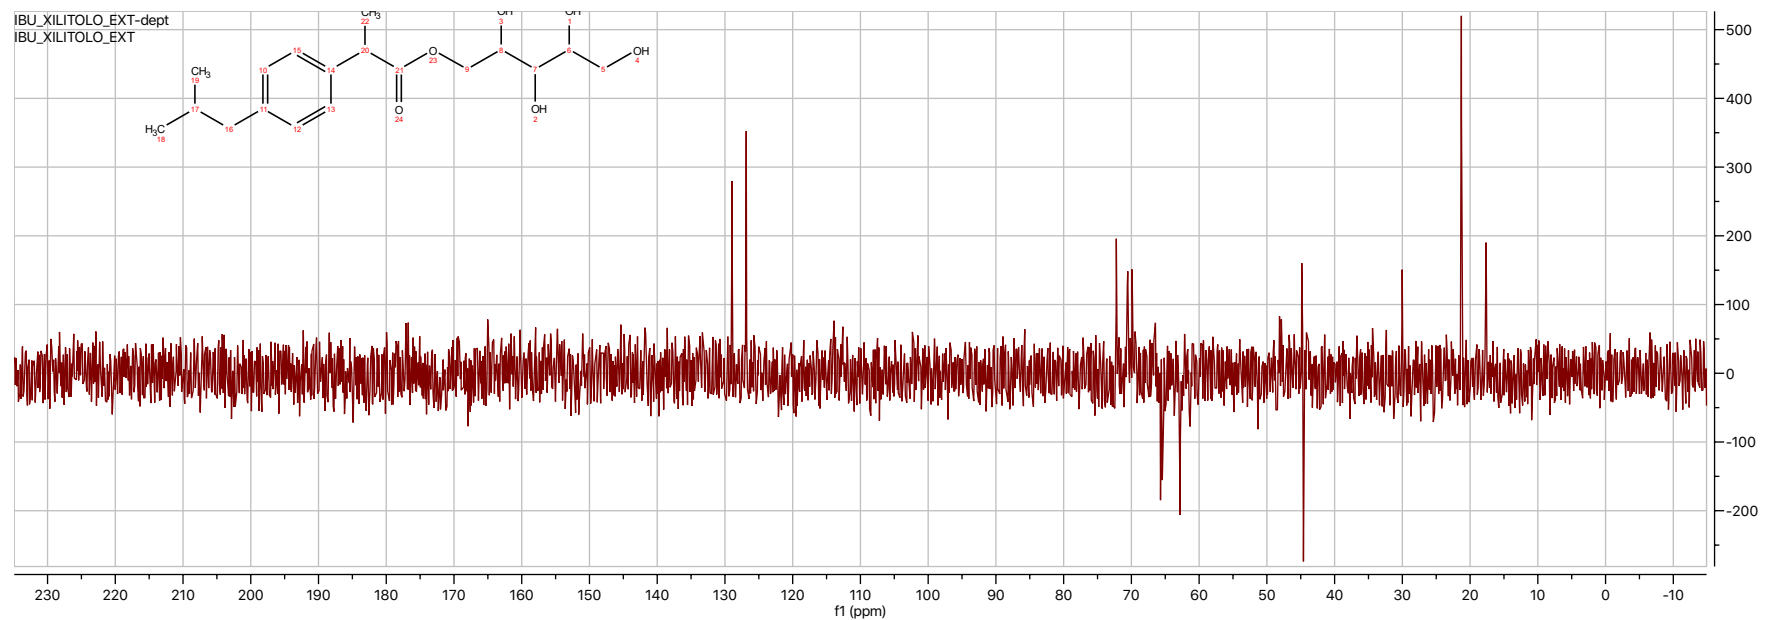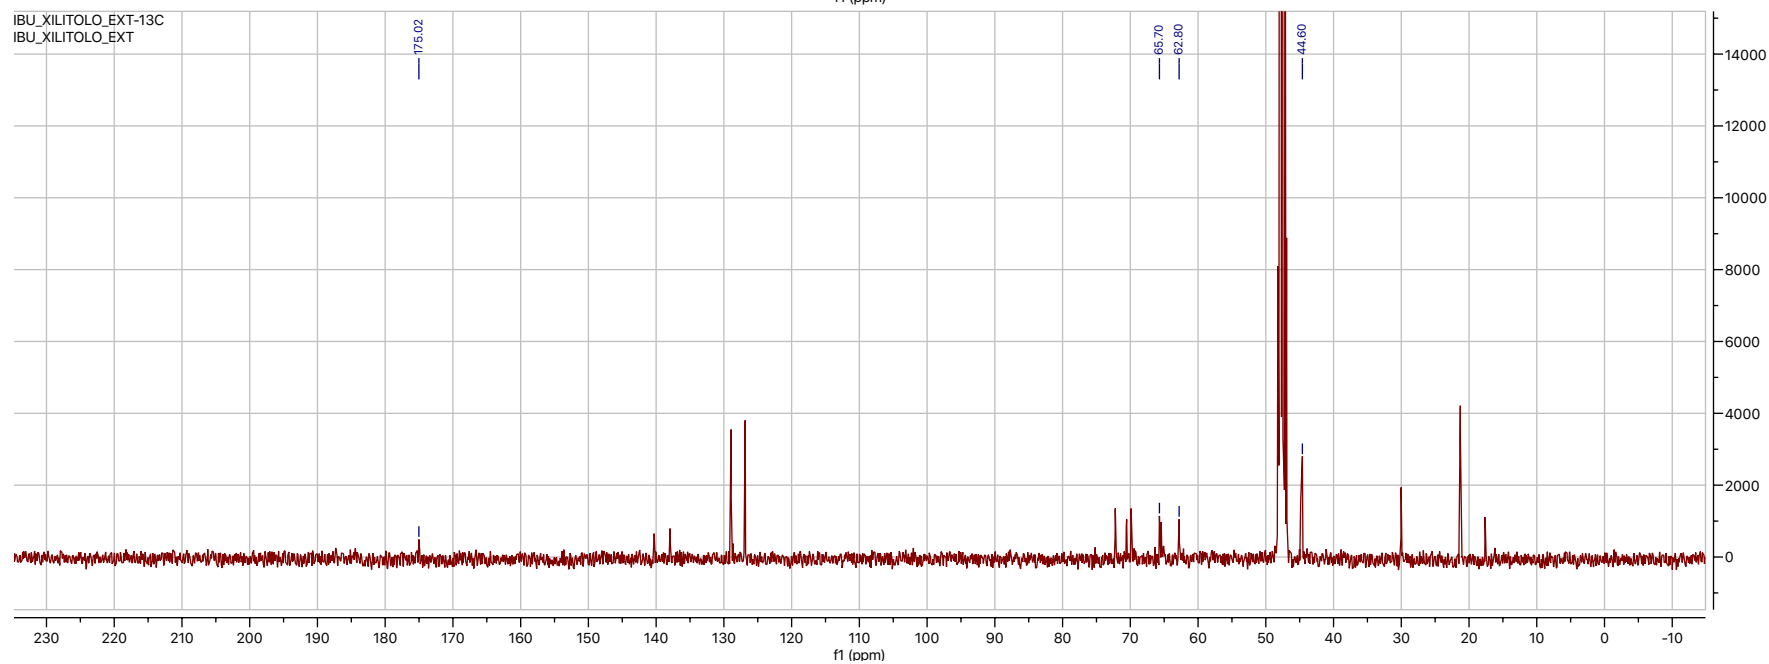

Figure S4: DEPT IBU-xylitol ester; RT, Methanol-d<sub>4</sub>, 101 MHz.

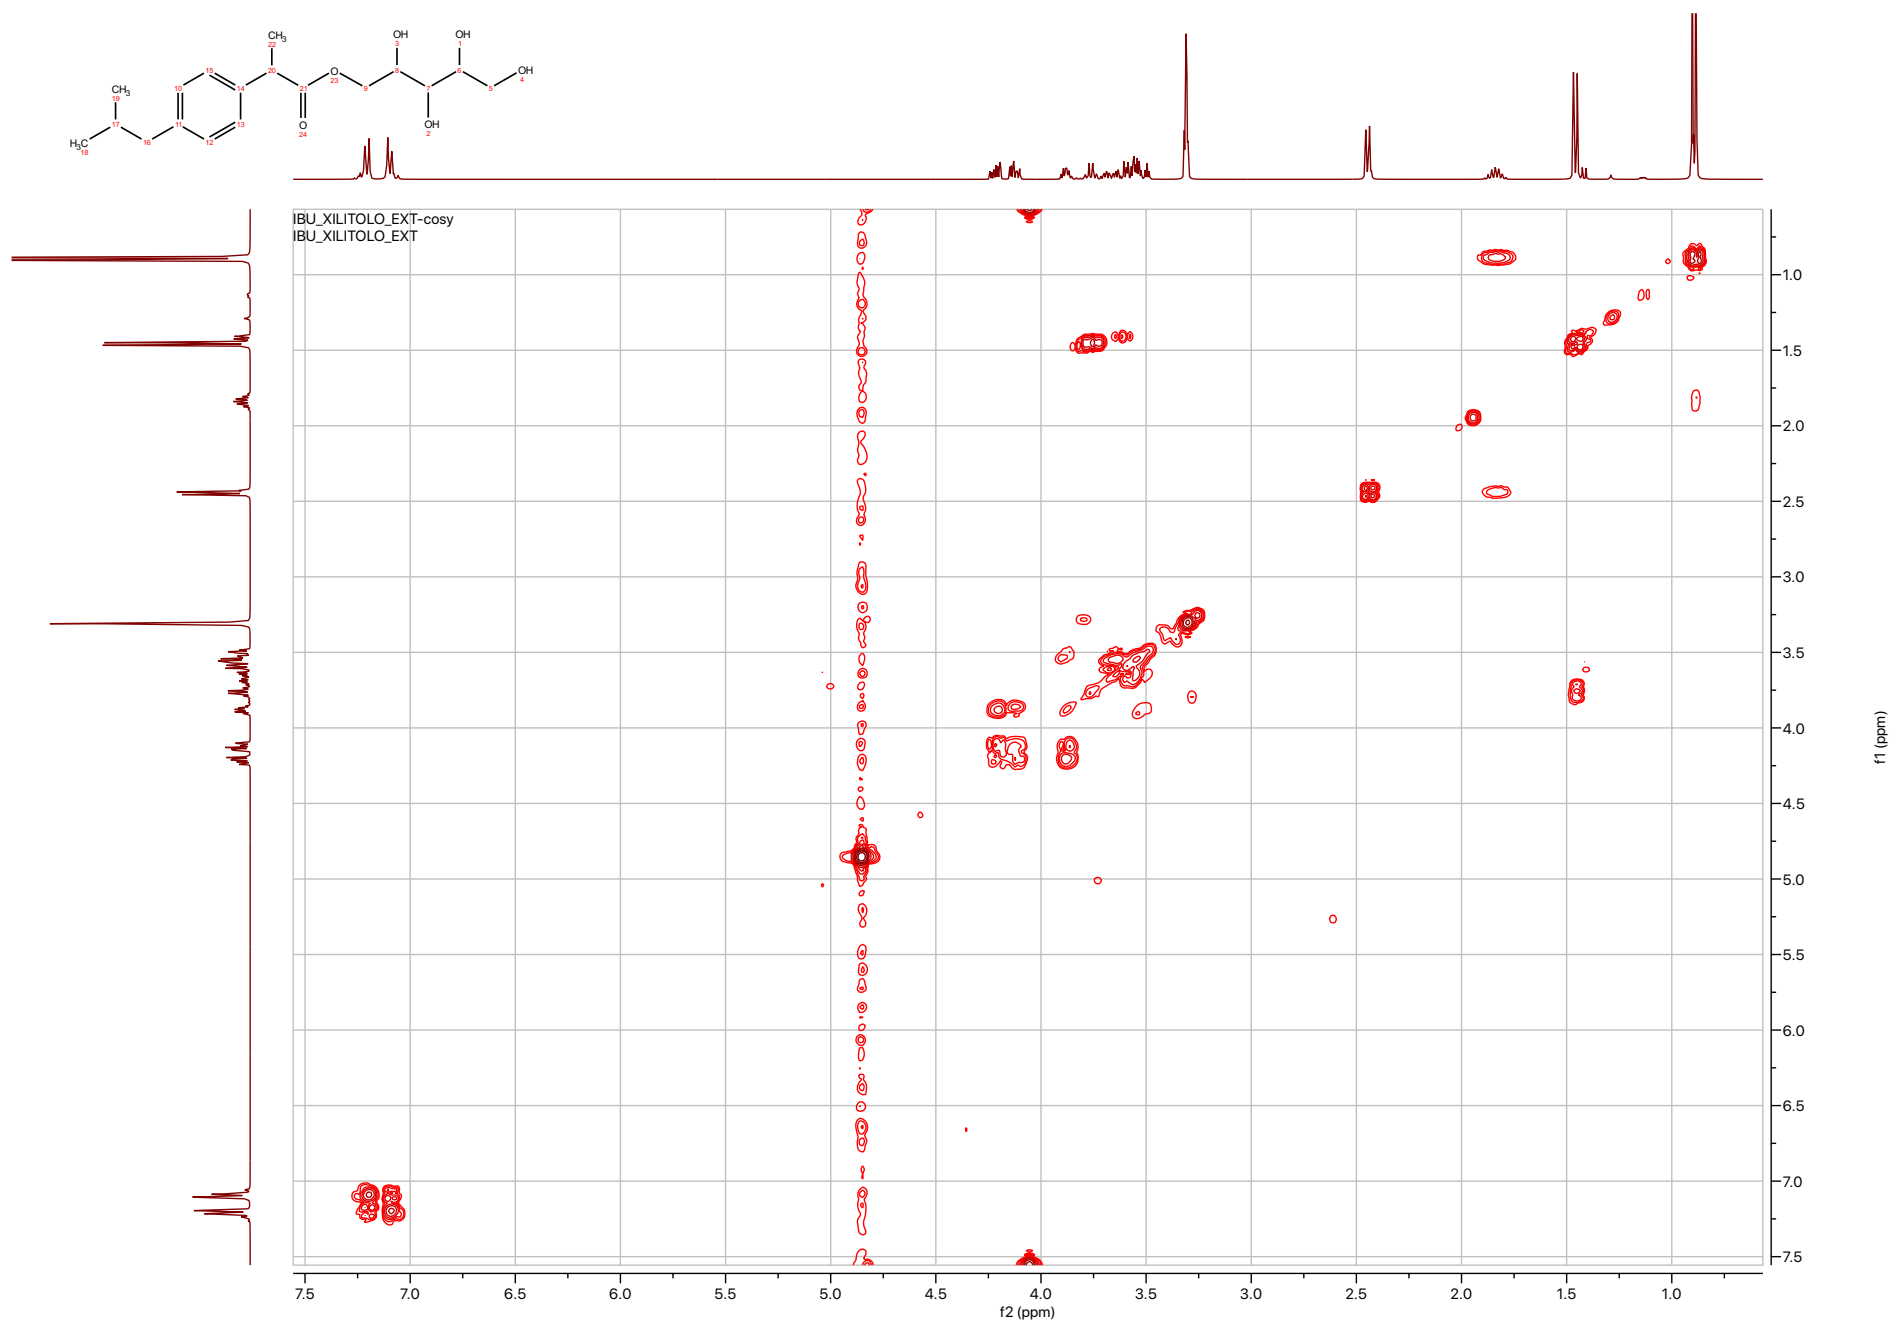

Figure S5: COSY IBU-xylitol ester; RT, Methanol-d<sub>4</sub>, 101 MHz

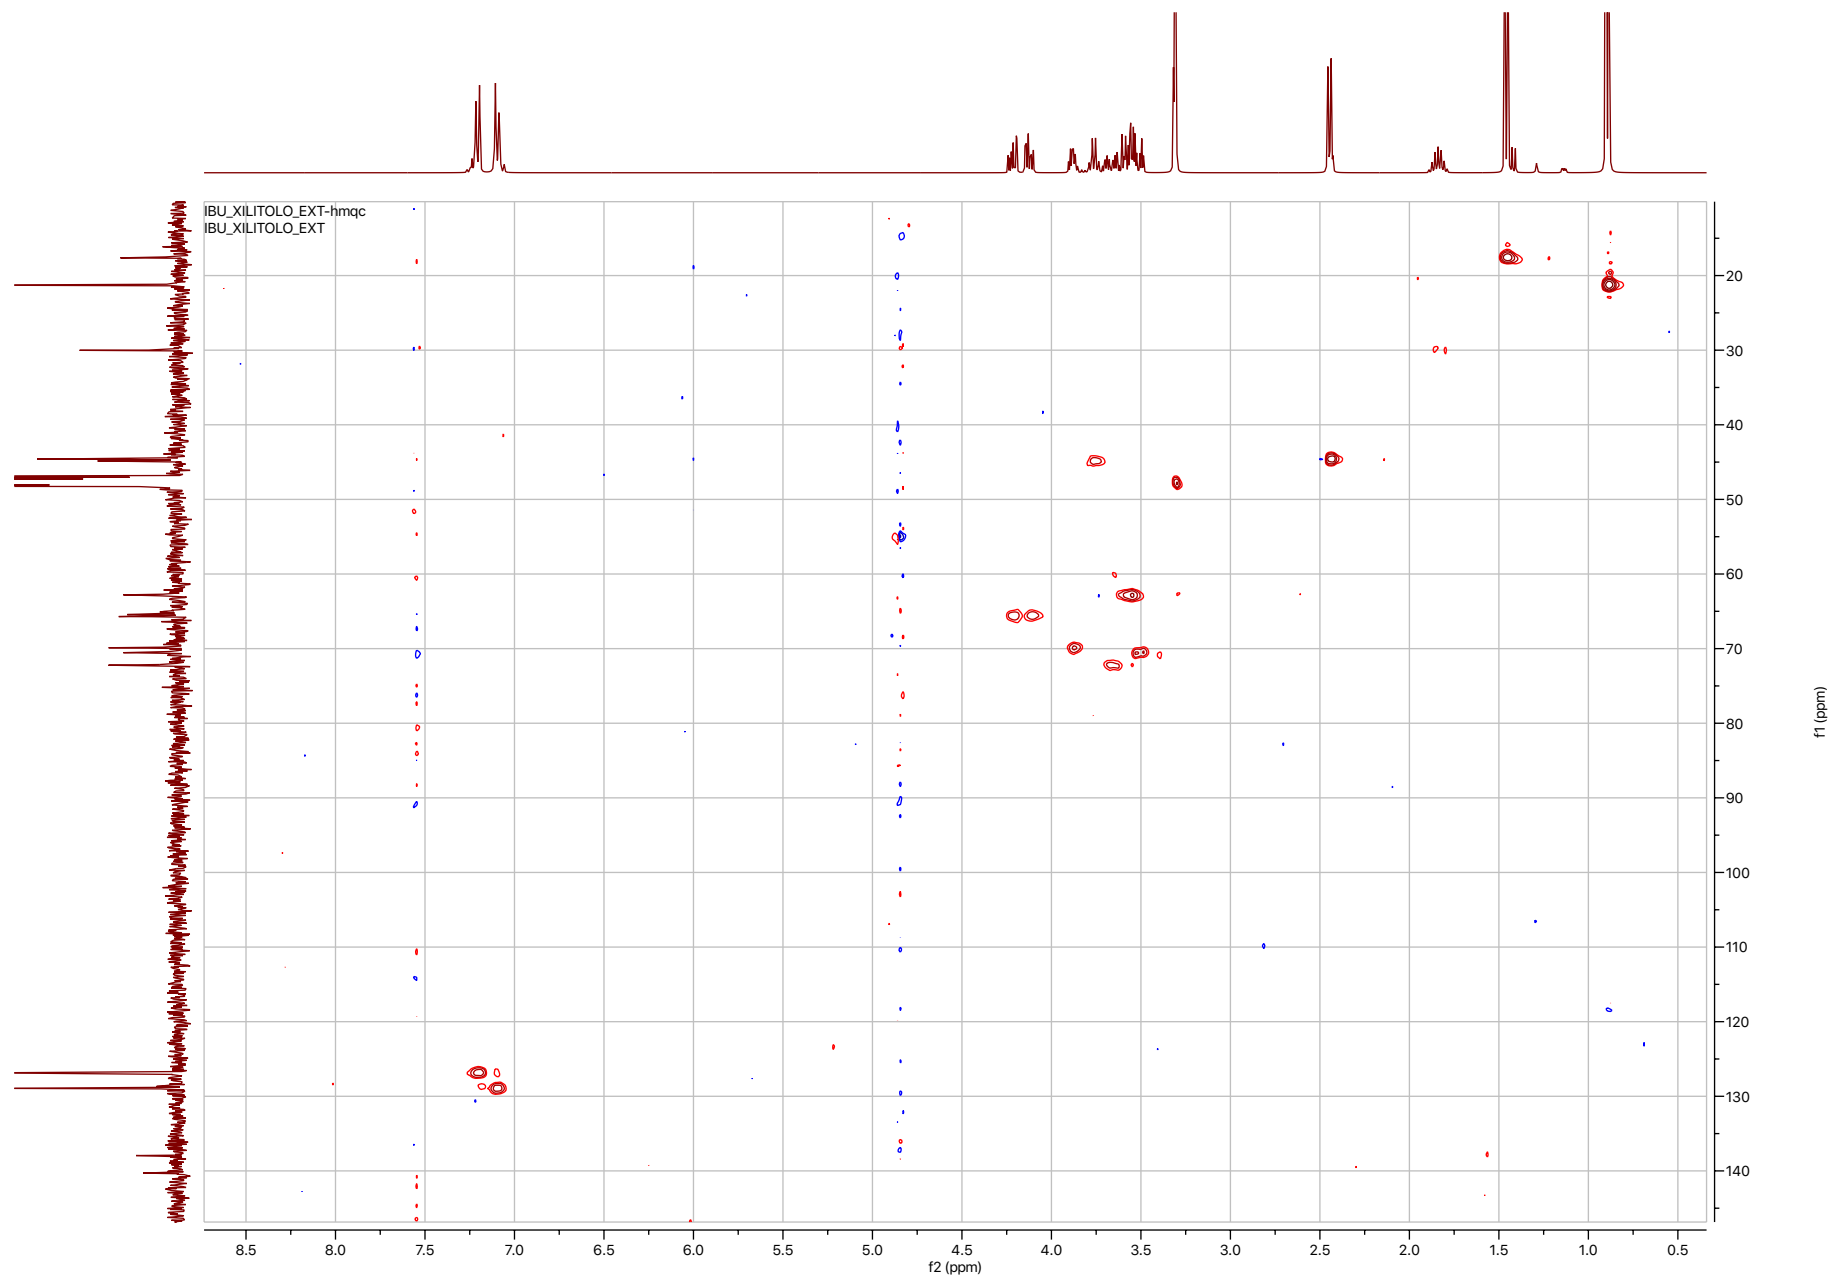

Figure S6: HMQC IBU-xylitol ester

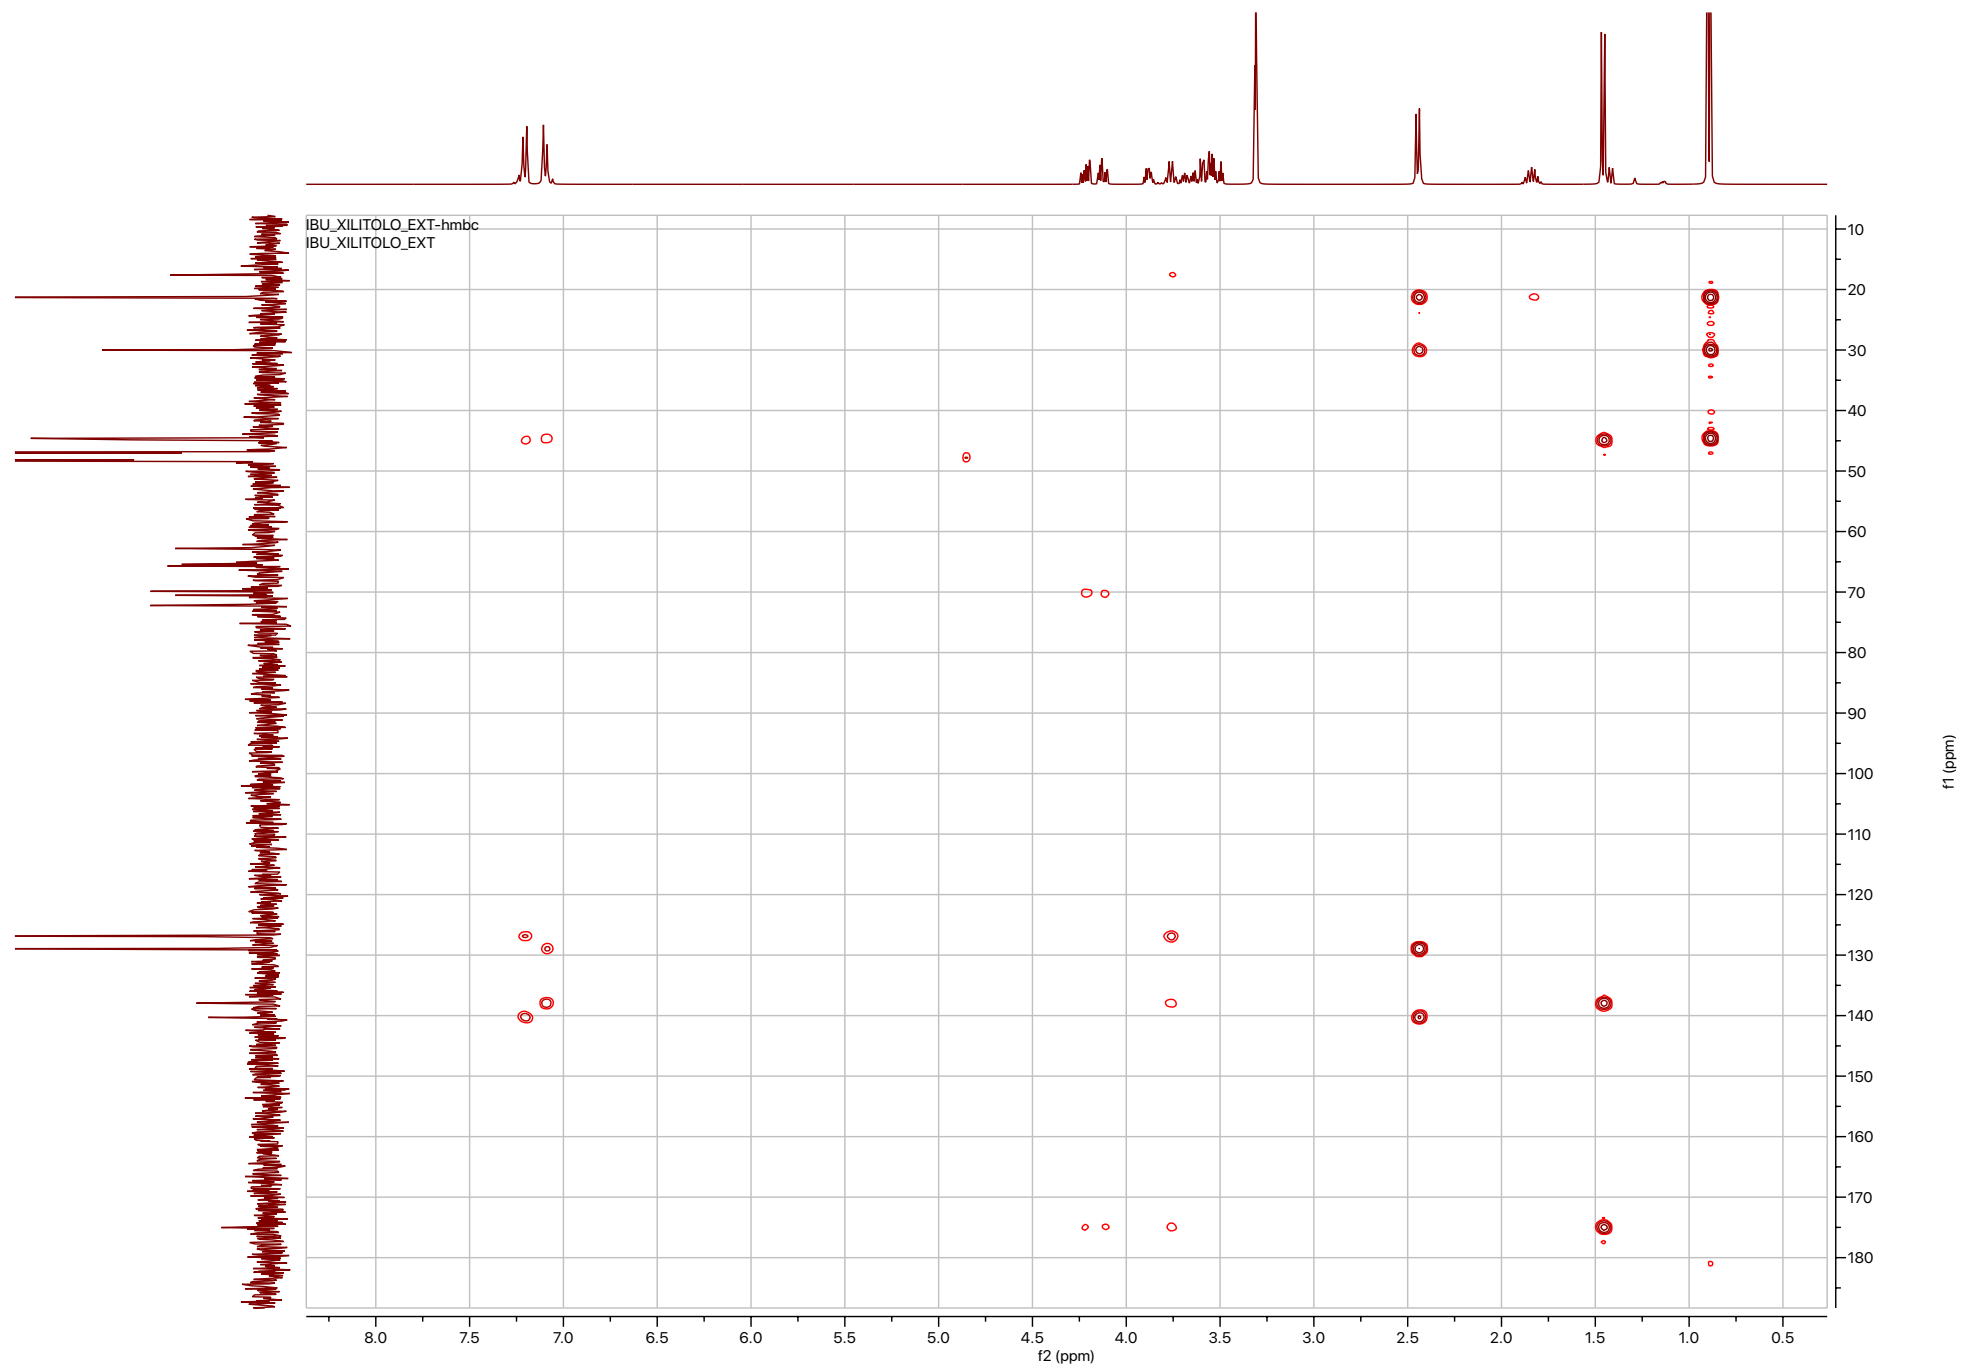

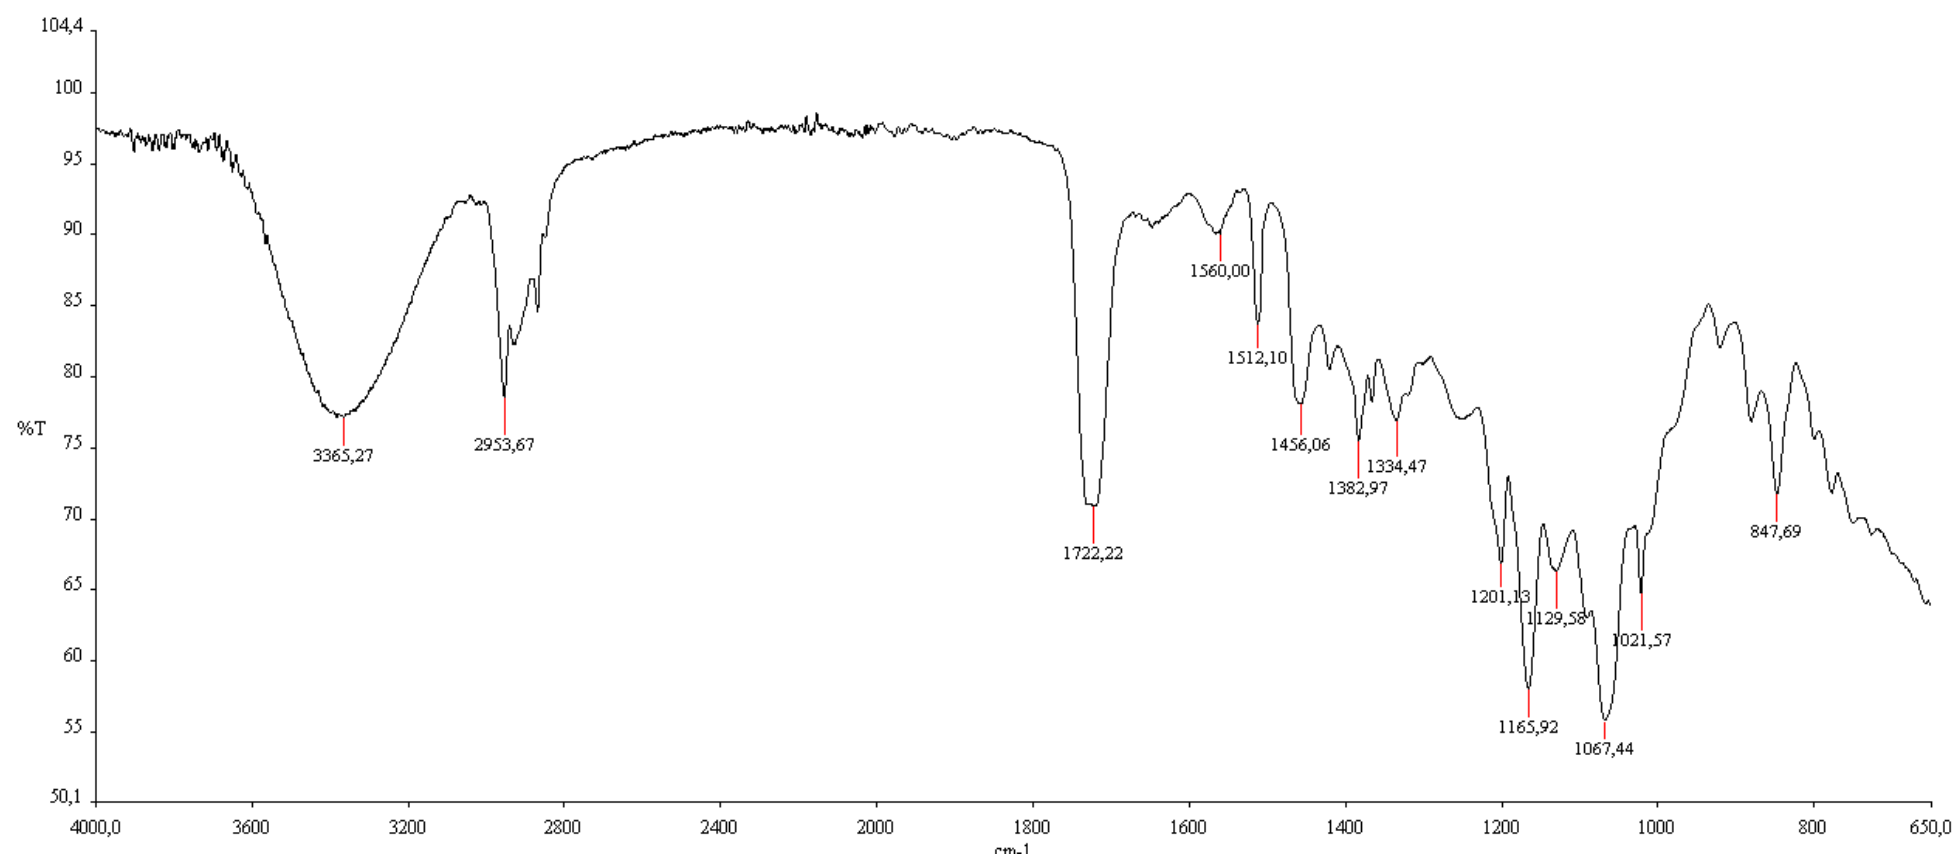

Figure S8: IR spectra of IBU-xylitol ester



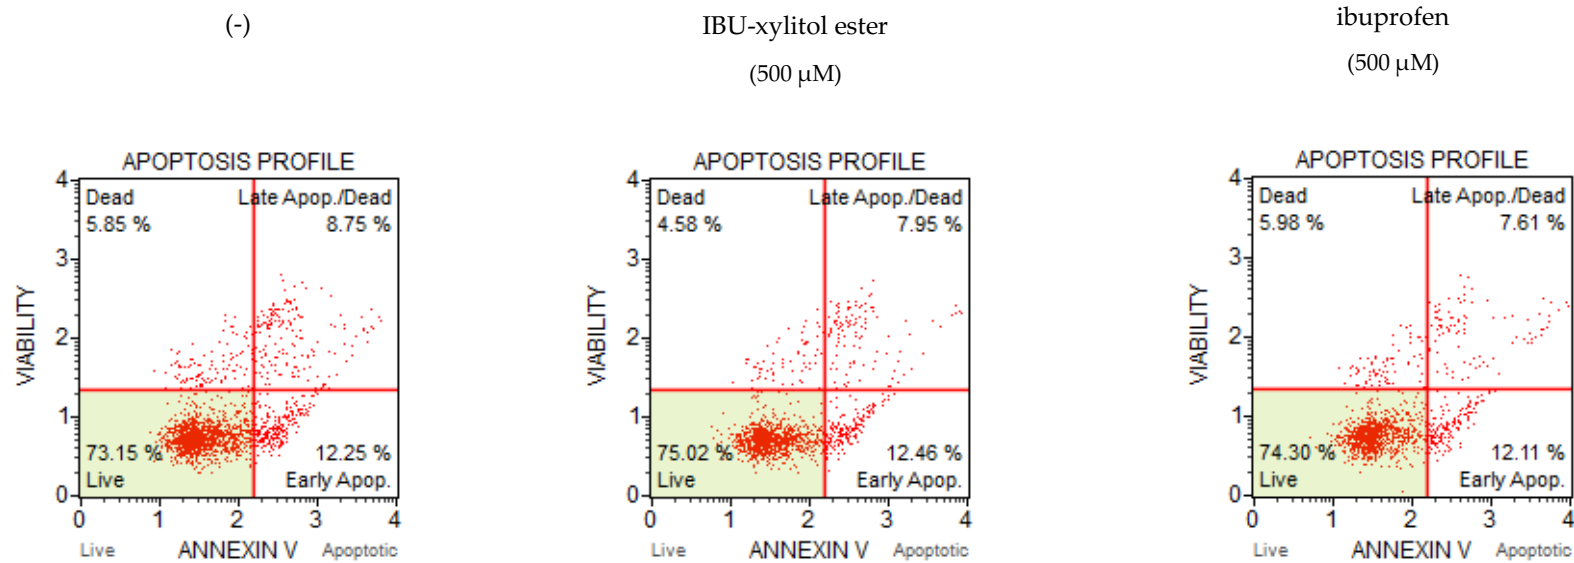

Figure S9: Representative analysis of apoptosis of IB3-1 cells cultured for 24h in the presence of the indicated concentrations of IBU-xylitol ester and ibuprofen. Apoptosis was assessed by the Annexin V assay.
